# Supplementary material
Source: PubMed Central journal article supplement (PMC2435146)
Supplement: pbio.0060146.sd001.pdf [file pbio.0060146.sd001.pdf]

**Supplementary Note 1 : The steady state intracellular leucine level is independent of most model parameters.**

To see why the leucine level at steady state depends only on the upstream flux in our model, consider the following equations, which determine the steady state leucine value:

$$\frac{dI_1}{dt} = \frac{c_3 E_u K_5^2}{P^2 + K_5^2} - \frac{c_4 E_1 I_1}{I_1 + K_3} - d_3 I_1$$

$$\frac{dI_2}{dt} = \frac{c_4 E_1 I_1}{I_1 + K_3} - \frac{c_5 E_2 I_2}{I_2 + K_4} - d_4 I_2$$

$$\frac{dP}{dt} = \frac{c_5 E_2 I_2}{I_2 + K_4} + F_{ext} - d_5 P$$

Assuming the decay terms for the intermediates ( $d_3 I_1$  and  $d_4 I_2$ ) can be neglected, the flux terms for the intermediates cancel in the summation of these three equations, which leads to

$$\frac{c_3 E_u}{P^2 + K_5^2} + F_{ext} - d_5 P = 0$$

It follows that the solution for  $P$  depends only on the upstream enzyme  $E_u$  and the external flux  $F_{ext}$ , and not on the levels of the downstream enzymes.
