# Supplementary material
Source: PubMed Central journal article supplement (PMC2435146)
Supplement: pbio.0060146.sd002.pdf [file pbio.0060146.sd002.pdf]

**Supplementary Note 2 : The upstream fluxes can balance much more quickly than the pathway response time.**

Consider an enzyme E operating far below  $V_{\max}$  in a linear pathway. Assume that the flux upstream of the enzyme changed at time  $t=0$ . We estimate how long it takes for the flux through the enzyme to balance the upstream flux. The dynamics of the substrate S of the enzyme, produced by the upstream flux, are governed by the equation

$$\frac{dS}{dt} = F_u - \frac{K_{cal} ES}{S + K_m},$$

where  $F_u$  is the upstream flux, and the second term is the flux through the enzyme given by standard Michaelis-Menten kinetics. Under the assumption that the enzyme is operating far below  $V_{\max}$ , that is,  $S \ll K_m$ , the equation reduces to

$$\frac{dS}{dt} = F_u - \frac{S}{\tau}, \text{ with the time constant } \tau = \frac{K_m}{K_{cal} E}.$$

The solution to this equation is

$$\frac{S}{\tau} = F_u + (S_0 - F_u) \exp(-t/\tau),$$

where  $S_0$  is the initial concentration of the substrate. Thus the flux through the enzyme relaxes to the upstream flux  $F_u$  exponentially with time constant  $\tau$ . To get an order of magnitude estimate of  $\tau$ , we use  $K_m = 0.5$  mM,  $E = 10^4$  molecules/cell, which translates to about 0.3  $\mu$ M assuming the cell volume is  $50 \mu\text{m}^3$ , and  $K_{cal} = 600/\text{min}$ . These parameters yield  $\tau = 3$  minutes. Thus the time it takes to reach flux balance is much faster than the typical response time of the pathway.
