# Supplementary material
Source: PubMed Central journal article supplement (PMC2435146)
Supplement: pbio.0060146.st001.pdf [file pbio.0060146.st001.pdf]

| Strain ID | Genotype (MATa)                                      |
|-----------|------------------------------------------------------|
| yCS0001   | ura3-52 LEU1::GFP-KanMX                              |
| yCS0003   | ura3-52 LEU2::GFP-KanMX                              |
| yCS0005   | ura3-52 LEU4::GFP-KanMX                              |
| yCS0010   | ura3-52 ILV3::GFP-KanMX                              |
| yCS0011   | ura3-52 ILV6::GFP-KanMX                              |
| yCS0012   | ura3-52 LEU9::GFP-KanMX                              |
| yCS0013   | ura3-52 ILV5::GFP-KanMX                              |
| yCS0014   | ura3-52 ILV2::GFP-KanMX                              |
| yCS0015   | ura3-52 LEU1::GFP-KanMX leu3Δ::URA3                  |
| yCS0016   | ura3-52 LEU2::GFP-KanMX leu3Δ::URA3                  |
| yCS0017   | ura3-52 LEU4::GFP-KanMX leu3Δ::URA3                  |
| yCS0018   | ura3-52 LEU9::GFP-KanMX leu3Δ::URA3                  |
| yCS0019   | ura3-52 ILV6::GFP-KanMX leu3Δ::URA3                  |
| yCS0020   | ura3-52 ILV3::GFP-KanMX leu3Δ::URA3                  |
| yCS0021   | ura3-52 ILV5::GFP-KanMX leu3Δ::URA3                  |
| yCS0032   | ura3-52 ILV2::GFP-KanMX leu3Δ::URA3                  |
| yCS0026   | ura3-52 LEU1::GFP-KanMX gcn2Δ::URA3                  |
| yCS0027   | ura3-52 LEU2::GFP-KanMX gcn2Δ::URA3                  |
| yCS0028   | ura3-52 LEU4::GFP-KanMX gcn2Δ::URA3                  |
| yCS0028   | ura3-52 LEU9::GFP-KanMX gcn2Δ::URA3                  |
| yCS0033   | ura3-52 ILV2::GFP-KanMX gcn2Δ::URA3                  |
| yCS0034   | ura3-52 IVL3::GFP-KanMX gcn2Δ::URA3                  |
| yCS0035   | ura3-52 ILV6::GFP-KanMX gcn2Δ::URA3                  |
| yCS0037   | ura3-52 IVL5::GFP-KanMX gcn2Δ::URA3                  |
| yCS0024   | ura3-52 LEU1::GFP-KanMX P <sub>GAL1</sub> -LEU1-URA3 |
| yVC0003   | ura3-52 LEU4::GFP-KanMX gcn4Δ::NAT                   |
