# Supplementary material
Source: PubMed Central journal article supplement (PMC2435146)
Supplement: pbio.0060146.st002.pdf [file pbio.0060146.st002.pdf]

| Parameter              | Estimate                                 | Value                                                |
|------------------------|------------------------------------------|------------------------------------------------------|
| $b_1$                  | --                                       | $1.02 \times 10^{-6} \text{ mM min}^{-1}$            |
| $c_1$                  | $1.7 \times 10^{-4} \text{ mM min}^{-1}$ | $5.08 \times 10^{-4} \text{ mM min}^{-1}$            |
| $d_1$                  | $0.0058 \text{ min}^{-1}$                | $0.0079 \text{ min}^{-1}$                            |
| $K_1$                  | $0.25 \text{ mM}$                        | $0.053 \text{ mM}$                                   |
| $b_2$                  | --                                       | $3.5 \times 10^{-7} \text{ mM min}^{-1}$             |
| $c_2$                  | $1.1 \times 10^{-4} \text{ mM min}^{-1}$ | $5.18 \times 10^{-5} \text{ mM min}^{-1}$            |
| $d_2$                  | $0.0058 \text{ min}^{-1}$                | $0.0064 \text{ min}^{-1}$                            |
| $K_2$                  | $0.25 \text{ mM}$                        | $0.035 \text{ mM}$                                   |
| $c_3 E_u$              | $2 \text{ mM min}^{-1}$                  | $0.32 \text{ mM min}^{-1}$                           |
| $c_4$                  | $500 \text{ min}^{-1}$                   | $2.64 \times 10^3 \text{ min}^{-1}$                  |
| $d_3$                  | $0.0058 \text{ min}^{-1}$                | $0.011 \text{ min}^{-1}$                             |
| $K_3$                  | $0.5 \text{ mM}$                         | $2.71 \text{ mM}$                                    |
| $c_5$                  | $800 \text{ min}^{-1}$                   | $108 \text{ min}^{-1}$                               |
| $d_4$                  | $0.0058 \text{ min}^{-1}$                | $0.0080 \text{ min}^{-1}$                            |
| $K_4$                  | $0.3 \text{ mM}$                         | $0.22 \text{ mM}$                                    |
| $d_5$                  | $0.3 \text{ min}^{-1}$                   | $0.077 \text{ min}^{-1}$                             |
| $K_5$                  | $0.1 \text{ mM}$                         | $0.66 \text{ mM}$                                    |
| $F_{\text{ext}}$       | --                                       | $1.42 \text{ mM min}^{-1}$ if $t < 0$ ; 0 if $t > 0$ |
| $E_1(0)$               | $2.2 \times 10^{-4} \text{ mM}$          | $2.2 \times 10^{-4} \text{ mM}$                      |
| $E_2(0)$               | $7.9 \times 10^{-5} \text{ mM}$          | $7.9 \times 10^{-5} \text{ mM}$                      |
| $I_1(0)$               | --                                       | $1.8 \times 10^{-3} \text{ mM}$                      |
| $I_2(0)$               | --                                       | $8.6 \times 10^{-3} \text{ mM}$                      |
| $P(0)$                 | $2 \text{ mM}$                           | $18.4 \text{ mM}$                                    |
| $\varphi_{\text{ext}}$ | --                                       | $0.18 \text{ mM min}^{-1}$                           |
| $b_{\text{ext}}$       | --                                       | $1.8 \times 10^{-4} \text{ mM min}^{-1}$             |
